# Supplementary material for: Comparison of carbon dots prepared from collagen peptides using conventional hydrothermal and microwave methods
Source: Royal Society of Chemistry journal article supplement (doi:10.1039/d2nj04211h), 2023-01-01
Supplement: d2nj04211h1.pdf [file d2nj04211h1.pdf]

## Supplementary Material

### Comparison of Carbon Dots Prepared from Collagen Peptide Using Conventional Hydrothermal and Microwave Methods

Chengzhi Xu<sup>1</sup>, Jizhen Kang<sup>2</sup>, Yanqiu Zhao<sup>2</sup>, Lian Zhu<sup>1</sup>, Juntao Zhang<sup>1</sup>, Benmei Wei<sup>1</sup>,  
Haibo Wang<sup>1,\*</sup>

<sup>1</sup> School of Chemistry and Environmental Engineering, Wuhan Polytechnic University, Wuhan,  
Hubei, China

<sup>2</sup> School of Food Science and Engineering, Wuhan Polytechnic University, Wuhan, Hubei, China

\*To whom correspondence should be addressed: wanghaibo@whpu.edu.cn

#### 1. Characterization of the Structure and Composition of Fish Scale Collagen Peptide

**Table S1.** Amino acid composition of fish scale collagen peptide

| Amino acid     | Number of residues/1000 amino acid residues |
|----------------|---------------------------------------------|
| Aspartic acid  | 43.01                                       |
| Threonine      | 18.71                                       |
| Serine         | 37.93                                       |
| Glutamate      | 79.00                                       |
| Proline        | 100.97                                      |
| Glycine        | 326.39                                      |
| Alanine        | 91.41                                       |
| Cysteine       | 4.58                                        |
| Valine         | 19.73                                       |
| Methionine     | 7.73                                        |
| Isoleucine     | 9.46                                        |
| Leucine        | 24.20                                       |
| Tyrosine       | 3.36                                        |
| Phenylalanine  | 10.17                                       |
| Lysine         | 5.59                                        |
| Histidine      | 21.86                                       |
| Arginine       | 58.67                                       |
| Hydroxyproline | 137.26                                      |

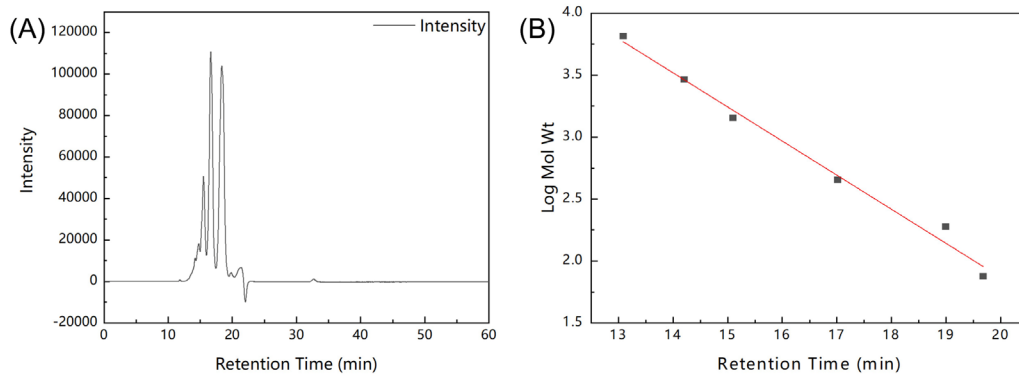

**Figure S1.** Gel permeation chromatography elution profile of fish scale collagen peptides

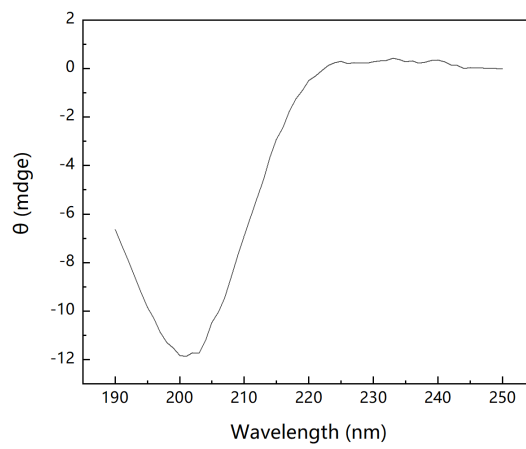

**Figure S2.** Circular dichroism chromatogram of fish scale collagen peptide

## 2. Single-factor analysis and orthogonal-experiment optimization reaction parameters for CDs

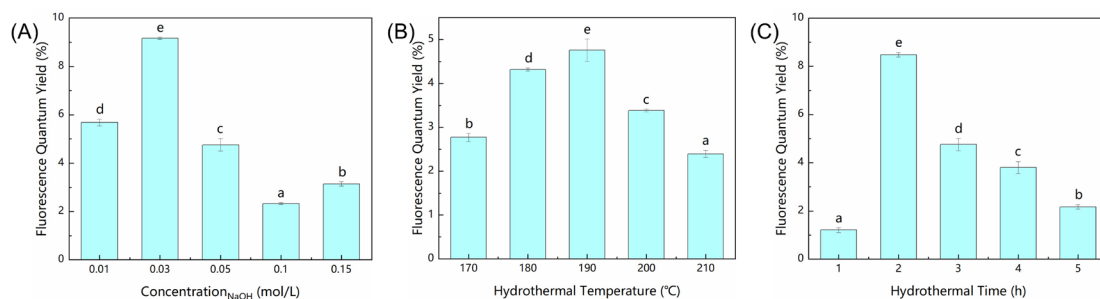

**Figure S3.** The effect of NaOH concentration (A), hydrothermal temperature (B) and hydrothermal time (B) on the quantum yield of CDs-HT. The results were presented as mean  $\pm$  standard deviation ( $n=3$ ). The differences between means were evaluated by Duncan's multiple-range test, means that contain different letters are significantly different at  $P<0.05$ .

**Table S2.** The experimental design based on  $L_9(3^4)$  orthogonal array and experimental results of preparation conditions for CDs-HT

| No.   | A (NaOH concentration) | B (Hydrothermal time) | C (Empty column) | D (Hydrothermal temperature) | Quantum yield (%) |
|-------|------------------------|-----------------------|------------------|------------------------------|-------------------|
| 1     | 0.01                   | 1                     |                  | 180                          | 4.43              |
| 2     | 0.01                   | 2                     |                  | 190                          | 3.21              |
| 3     | 0.01                   | 3                     |                  | 200                          | 1.15              |
| 4     | 0.03                   | 1                     |                  | 200                          | 5.94              |
| 5     | 0.03                   | 2                     |                  | 180                          | 1.83              |
| 6     | 0.03                   | 3                     |                  | 190                          | 9.21              |
| 7     | 0.05                   | 1                     |                  | 190                          | 3.04              |
| 8     | 0.05                   | 2                     |                  | 200                          | 8.38              |
| 9     | 0.05                   | 3                     |                  | 180                          | 4.35              |
| $K_1$ | 8.80                   | 13.42                 |                  | 10.62                        |                   |
| $K_2$ | 16.98                  | 13.43                 |                  | 15.48                        |                   |
| $K_3$ | 15.78                  | 14.72                 |                  | 15.47                        |                   |
| $k_1$ | 2.93                   | 4.47                  |                  | 3.54                         |                   |
| $k_2$ | 5.66                   | 4.48                  |                  | 5.16                         |                   |
| $k_3$ | 5.26                   | 4.91                  |                  | 5.16                         |                   |
| $R$   | 8.18                   | 1.29                  |                  | 4.86                         |                   |

$K$ , Sum of quantum yield for the factors at each level;  $k$ , The mean values for the factors at each level;  $R$ ,  $K_{\max}-K_{\min}$ .

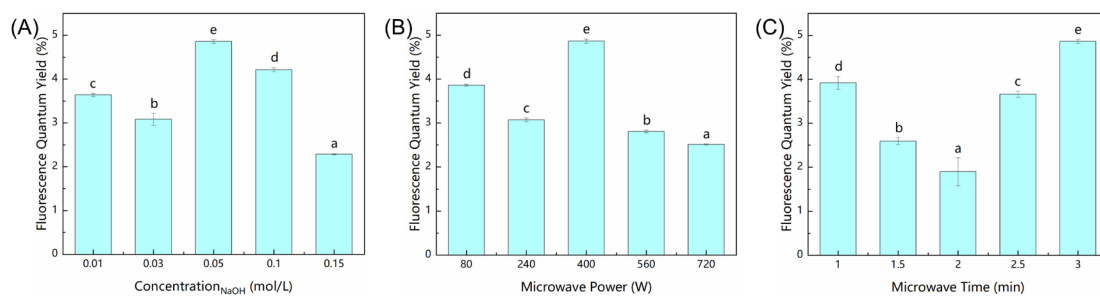

**Figure S4.** The effect of NaOH concentration (A), microwave power (B) and microwave time (C) on the quantum yield of CDs-MW. The results were presented as mean  $\pm$  standard deviation ( $n=3$ ).

The differences between means were evaluated by Duncan's multiple-range test, means that contain different letters are significantly different at  $P<0.05$ .

**Table S3.** The experimental design based on  $L_9(3^4)$  orthogonal array and experimental results of preparation conditions for CDs-MW

| No.   | A (NaOH concentration) | B (Microwave time) | C (Empty column) | D (Microwave power) | Quantum yield (%) |
|-------|------------------------|--------------------|------------------|---------------------|-------------------|
| 1     | 0.03                   | 2.0                |                  | 240                 | 3.64              |
| 2     | 0.03                   | 2.5                |                  | 400                 | 3.34              |
| 3     | 0.03                   | 3.0                |                  | 560                 | 3.37              |
| 4     | 0.05                   | 2.0                |                  | 560                 | 2.97              |
| 5     | 0.05                   | 2.5                |                  | 240                 | 2.62              |
| 6     | 0.05                   | 3.0                |                  | 400                 | 4.86              |
| 7     | 0.1                    | 2.0                |                  | 400                 | 3.37              |
| 8     | 0.1                    | 2.5                |                  | 560                 | 2.60              |
| 9     | 0.1                    | 3.0                |                  | 240                 | 4.28              |
| $K_1$ | 10.34                  | 9.98               |                  | 10.53               |                   |
| $K_2$ | 10.46                  | 8.55               |                  | 11.57               |                   |
| $K_3$ | 10.24                  | 12.51              |                  | 8.94                |                   |
| $k_1$ | 3.45                   | 3.33               |                  | 3.51                |                   |
| $k_2$ | 3.49                   | 2.85               |                  | 3.86                |                   |
| $k_3$ | 3.41                   | 4.17               |                  | 2.98                |                   |
| $R$   | 0.22                   | 3.95               |                  | 2.63                |                   |

$K$ , Sum of quantum yield for the factors at each level;  $k$ , The mean values for the factors at each level;  $R$ ,  $K_{\max}-K_{\min}$ .

### 3. Fluorescence stability of CDs

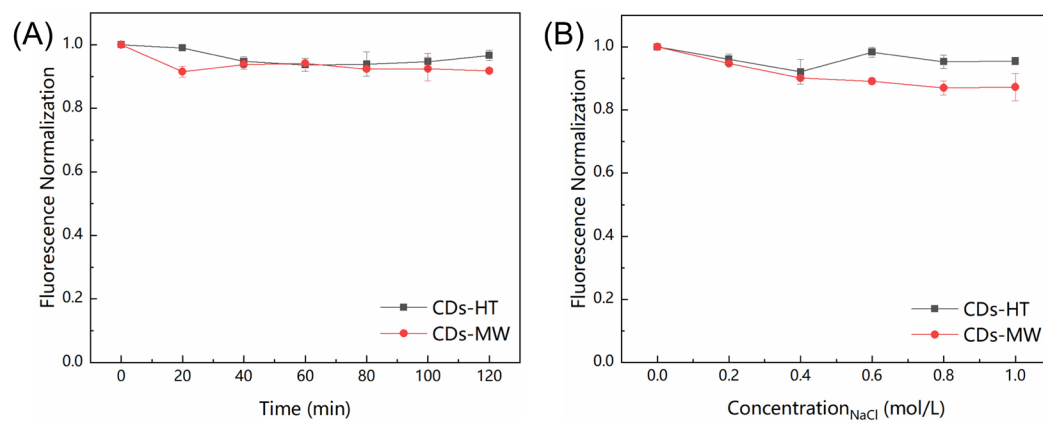

**Figure S5.** Effects of xeno-lamp irradiation (A) and ion intensity (B) on the fluorescence intensity of CDs

#### 4. Characterization of Surface Properties of CDs

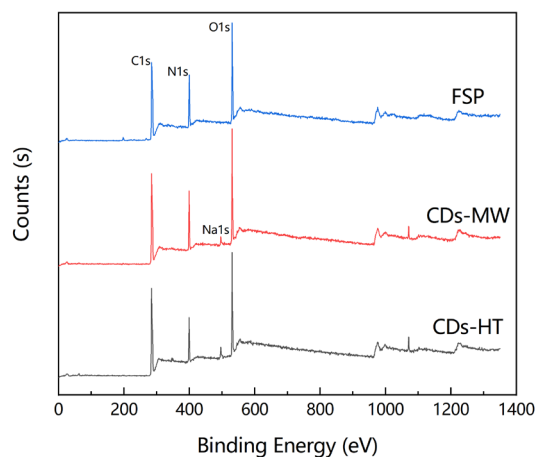

**Figure S6.** XPS full-scan survey spectra of CDs-HT, CDs-MW and FSP

**Table S4.** Peak parameters obtained by deconvolution of the XPS spectra

| Sample | Peak | Position (eV) | Area     | FWHM (eV) | Area (%) | Sample | Peak | Position (eV) | Area     | FWHM (eV) | Area (%) |
|--------|------|---------------|----------|-----------|----------|--------|------|---------------|----------|-----------|----------|
| CDs-HT | 1    | 284.8         | 158657.1 | 1.8       | 58.7     | CDs-MW | 1    | 284.8         | 150530.5 | 1.8       | 51.9     |
|        | 2    | 285.9         | 28665.5  | 1.0       | 10.6     |        | 2    | 285.9         | 45372.3  | 1.0       | 15.6     |
|        | 3    | 286.5         | 11504.6  | 1.0       | 4.3      |        | 3    | 286.5         | 13148.5  | 1.0       | 4.5      |
|        | 4    | 287.7         | 71619.8  | 1.8       | 26.5     |        | 4    | 287.7         | 81014.5  | 1.7       | 27.9     |
|        | 5    | 398.5         | 6559.8   | 1.3       | 7.4      |        | 5    | 398.5         | 9732.1   | 1.5       | 7.8      |
|        | 6    | 399.6         | 48648.8  | 1.3       | 54.6     |        | 6    | 399.6         | 76048.4  | 1.3       | 60.6     |
|        | 7    | 400.2         | 25676.2  | 1.3       | 28.8     |        | 7    | 400.2         | 26168.2  | 1.3       | 20.8     |
|        | 8    | 401.3         | 8181.3   | 2.0       | 9.2      |        | 8    | 401.3         | 13626.1  | 2.0       | 10.9     |
|        | 9    | 531.1         | 188352.7 | 1.8       | 85.4     |        | 9    | 531.1         | 199174.1 | 1.8       | 83.7     |
|        | 10   | 532.5         | 32207.3  | 1.8       | 14.6     |        | 10   | 532.4         | 38673.3  | 1.8       | 16.3     |

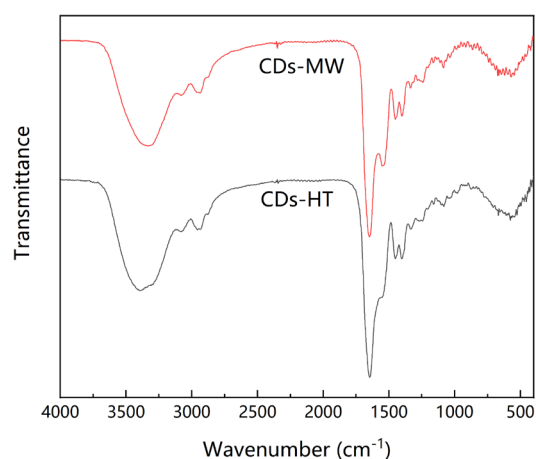

**Figure S7.** FTIR spectra of CDs-HT and CDs-MW

**Table S5.** Peak parameters obtained by deconvolution of the FTIR spectra (3800~2800cm<sup>-1</sup>)

| Sample | Center | Area | Amplitude | Center | Width | Sample | Center | Area | Amplitude | Center | Width |
|--------|--------|------|-----------|--------|-------|--------|--------|------|-----------|--------|-------|
| CDs-HT | 1652.1 | 83.8 | 0.918     | 1652.1 | 85.8  | CDs-MW | 1654.7 | 75.6 | 0.917     | 1654.7 | 77.5  |
|        | 1563.4 | 36.6 | 0.441     | 1563.4 | 77.9  |        | 1566.4 | 40.4 | 0.436     | 1566.4 | 87.2  |
|        | 1524.0 | 6.9  | 0.150     | 1524.0 | 43.6  |        | 1525.3 | 13.4 | 0.238     | 1525.3 | 52.7  |
|        | 1451.9 | 10.7 | 0.241     | 1451.9 | 41.8  |        | 1450.0 | 11.3 | 0.251     | 1450.0 | 42.2  |
|        | 1402.2 | 8.5  | 0.202     | 1402.2 | 39.5  |        | 1400.8 | 7.6  | 0.197     | 1400.8 | 36.5  |
|        | 1381.8 | 0.7  | 0.039     | 1381.8 | 16.0  |        | 1382.7 | 0.3  | 0.024     | 1382.7 | 11.4  |

**Table S6.** Peak parameters obtained by deconvolution of the FTIR spectra (1800~1300cm<sup>-1</sup>)

| Sample | Center | Area  | Amplitude | Center | Width | Sample | Center | Area  | Amplitude | Center | Width |
|--------|--------|-------|-----------|--------|-------|--------|--------|-------|-----------|--------|-------|
| CDs-HT | 3544.8 | 30.1  | 0.201     | 3544.8 | 141.1 | CDs-MW | 3550.5 | 13.1  | 0.096     | 3550.5 | 128.1 |
|        | 3442.9 | 41.1  | 0.248     | 3442.9 | 155.8 |        | 3457.1 | 33.4  | 0.169     | 3457.1 | 185.4 |
|        | 3298.2 | 126.1 | 0.448     | 3298.2 | 264.5 |        | 3305.4 | 135.9 | 0.438     | 3305.4 | 291.6 |
|        | 3066.8 | 14.0  | 0.129     | 3066.8 | 102.5 |        | 3063.6 | 13.5  | 0.120     | 3063.6 | 105.3 |
|        | 2947.4 | 18.0  | 0.170     | 2947.4 | 99.4  |        | 2946.6 | 17.5  | 0.168     | 2946.6 | 97.9  |
|        | 2864.6 | 2.6   | 0.049     | 2864.6 | 50.5  |        | 2865.2 | 2.7   | 0.049     | 2865.2 | 50.5  |
